# Supplementary material for: Supraglacial debris thickness variability: Impact on ablation and relation to terrain properties
Source: Copernicus journal article supplement (doi:10.5194/tc-2018-83), 2018-06-06
Supplement: Supplementary file [file tc-2018-83-AC2-supplement.pdf]

## Response to reviewer 2:

---

We would like to thank reviewer 2 for a thorough review of our paper that identified a number of inconsistencies and ambiguities that we are happy to be able to clear up.

Our responses are given in blue below and highlighted in the revised manuscript using track changes.

### Main comments:

- 1) Author have analyzed debris thickness frequency which are measured by GPR, theodolite, SfM-MVS and excavation. I can imagine point measurements of debris thickness were carried out by theodolite, SfM-MVS and excavation. But, this paper have no information about the GPR. GPR also measure DT at each point or at some ranges in horizontal ( depend on the debris thickness??)?

The GPR does indeed sample a footprint rather than a single point, that is partially dependent on instrument geometry and the distance to the reflector. We used the GPR in a continuous sense to collect profiles of data, and then picked the reflector surface from this. Datapoints were extracted from this picked surface for subsequent analysis. We now add that:

“Debris thickness data was extracted from the picked ice surface at approximately 0.02 m ground spacing for subsequent data analysis.”

- 2) You have classified stable and unstable debris-covered area at just 27 degree in slope gradient. But, usually, steep slope have low accuracy in satellite- or SfM-DTM. Margin site might have no oversteepened grids if you change the critical value of slope.

The classification was based on the available data for our study site. Certainly a wider sampling of debris thickness could lead to adjustment of our classification of stable and unstable ground, but such data is not available. Our DTM from the Pleiades imagery resolves the steep slopes in our study area adequately, but we agree once could encounter issues if the available DTM is of insufficient quality.

We have now added a sensitivity study to the results of the stability modelling and find that:

“Perturbing slope stability model input variables by 10% generally resulted in small changes of up to 1% in areal percentage slope instability, indicating the model is relatively robust. However, adjusting the debris-ice friction coefficient by 10% caused relatively large changes of up to 9%. Increasing melt rate and the density of water to the density of wet debris ratio cause areal percentage slope instability to increase. Increasing hydraulic conductivity, the debris-ice friction coefficient, and debris thickness cause areal percentage slope instability to decrease. It is interesting to note that the Uplacier study area is most sensitive to input variable perturbation, presumably because debris is thinner and therefore melt rate are greatest in the Uplacier study area.”

### Specific comments:

Please consolidate the location name. Even all expressions are summarized in

Line 199-201, different expressions at each figure are not easy to understand for readers. You have wrote 'Gokyo' and 'Margin' in Fig. 2, 4, 6c, 6d and 9, but expressed by distance from terminus in Fig. 5. Please check other part in the manuscript. 'lower' 'middle' and 'upper' were also found in Line 382.

We have checked the manuscript and now use 'Uplacier', 'Gokyo' and 'Margin' to refer to the study sites shown in Figure 1 consistently throughout.

L120 Please add information of altitudes at each three site.

We added this information to the caption of Figure 2: "(a) Ngozumpa glacier showing the key study areas, ~7, 2 and 1 km from the glacier terminus at elevations of 4870, 4750 and 4740 m a.s.l. respectively"

L163 Author have wrote that 'McCarthy et al (2017) and range from 0.14-0.83 m, generally increasing with debris thickness' How much minimum thickness can be detect by GPR? Author have depicted Fig. 5, percentage frequency histograms of debris thickness in 0.05 m. Thin debris are important for following analysis.

The range 0.14-0.83 m, refers to the uncertainty associated with derived debris thickness, following the error propagation described in McCarthy and others 2017. Minimum detectable debris thickness depends on the GPR operating frequency and 'transmitter blanking effects'. We now add in the methods section that: "According to McCarthy et al (2017), transmitter blanking is limited to one wavelength below the surface and so minimum detectable debris thickness is roughly equal to the ratio of debris wave speed to radar frequency. In our case this would imply minimum detectable debris thickness of 0.27 m with the 600 MHz antenna and 0.80 m with the 200 MHz antenna."

Percentage frequency in Figure 5 is presented in 0.1 m bins. This has now been corrected in the figure caption. This bin interval was chosen to adequately display the data from all studies.

L175 '4.2 Ablation modelling' » It seems that temperature difference due to elevation difference at each three site have not been considered in this calculation. I think it is not necessary to consider the temperature difference, because the target of this calculation is to indicate the effect of debris thickness variability on ablation. But, you have to write that you have assumed that temperature were same with the Pyramids (?) at all sites.

Correct. As the modelling is idealized in any case we did not account for the elevation between our study sites. We have tried to clarify this in the text and now state: "The model does not account for variability in surface energy receipts due to local topoclimate, or the effects of spatially or temporally variable debris properties other than thickness, and the chosen input properties are only approximate. However, this does not preclude its illustrative use in investigating the influence of variable debris thickness on calculated ablation rate. Ablation modelling was carried out using the same forcing data varying only the local debris thickness information determined at: (i) the Margin study site ~1km from the glacier terminus, (ii) the main Gokyo study site ~2 km from the terminus, both measured by GPR in 2016, and (iii) the Uplacier study site ~7 km from the terminus, measured by theodolite survey in 2001 (Fig. 2)."

L239-240 There are no information of data source of air photographs taken in 1984.

Added reference to Washburn 81989) which provides details of the Swissair image flight.

Washburn, B.: Mapping Mount Everest, Bull. Am. Acad. Arts Sci., 42(7), 29–44, 1989.

L299-301 'the debris was generally too thick. This means there is the possibility of a slight thin bias in the data. However, penetration depth was often greater than 7 m, which is likely near the maximum debris thickness.' » Those sentences have been written subjectively without support information. Authors cannot declare without some references.

Thank you, we agree this type of claim should be avoided. We now rephrased this as: "For those radargrams in which the ice surface was not easily identifiable, the debris appeared to be too thick to detect. While this means there is the possibility of a slight thin bias in the data, it is reasonable to assume the impact is minimal because penetration depths exceed the thickness of any supraglacial debris exposures observed in the field (Nicholson and Benn, 2012; Nicholson and Mertes, 2017)."

L307 'see Section 5.3 and Fig. 6' » 'see Section 5.3 and Fig. 7'?

Thank you. This has been corrected to Fig 7.

L343 I cannot find Fig. 2b.

Thanks, we now include the photograph for Figure 2b as originally intended.

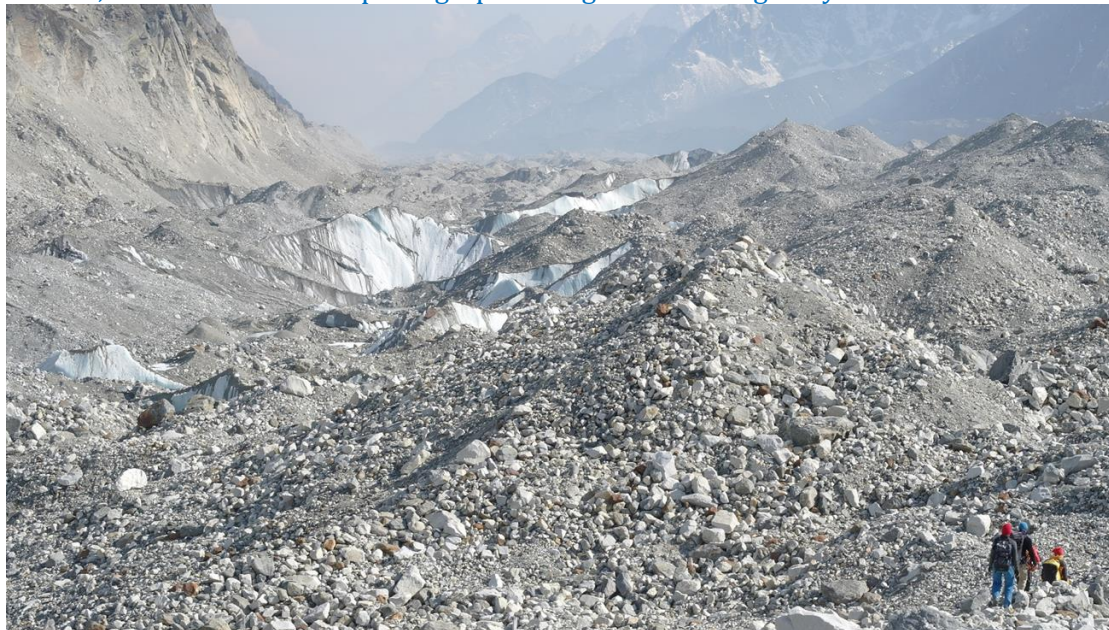

L354 If you have assumed that temperature difference depending on the altitude were not considered for the estimate of ablation, you have to add the information here. If you take into account the temperature difference, you have to add altitude at each three sites and temperature lapse rate.

We used the same meteorological forcing, as described in the methods section. To reiterate this point we now write: "The ablation calculated for typical August conditions at the pyramid weather station using the mean debris thickness at the Margin, Gokyo and Upglacier sites ..."

L355 and 362 The unit of vertical axis in Fig. 6c were mm day<sup>-1</sup>. but, 'm' in the manuscript. If both values indicate same things (I believe this), please consolidate. This figure and calculated values are very important in this paper.

Our original intent was that the monthly total lowering is easier to visualize than a lowering in mm/day. In order to maintain consistency we now provide both metrics in the text as follows: "The ablation calculated for typical August conditions at the pyramid weather station using the mean debris thickness at the Margin, Gokyo and Uplacier sites was 2.2, 3.6 and 10.5 mm day<sup>-1</sup> (Fig. 6c), totalling 0.07, 0.11 and 0.33 m of ice surface lowering over the month respectively. This agrees with the general expected patterns of ablation gradient reversal towards the terminus of a debris-covered glacier (e.g. Benn and Lehmkuhl, 2000; Bolch et al., 2008; Benn et al., 2017). Accounting for the percentage frequency distribution of debris thickness at the Margin, Gokyo and Uplacier sites increased the surface lowering rate to 2.5, 5.2 and 15.0 mm day<sup>-1</sup>, giving monthly total surface lowering of 0.08, 0.16 and 0.46 m respectively."

L360 ' 1, 3 and 7 km respectively.' » ' 1, 2 and 7 km respectively.' ???

This is now rephrased to keep with the site naming convention: "The ablation calculated for typical August conditions at the pyramid weather station using the mean debris thickness for at the Margin, Gokyo and Uplacier sites totalled 0.07, 0.11 and 0.32 m of ice surface lowering over the month respectively. This agrees with the general expected patterns of ablation gradient reversal towards the terminus of a debris-covered glacier (e.g. Benn and Lehmkuhl, 2000; Bolch et al., 2008; Benn et al., 2017). Accounting for the percentage frequency distribution of debris thickness at the Margin, Gokyo and Uplacier sites increased the monthly total surface lowering due to ablation to 0.08, 0.16 and 0.46 m respectively."

L370-373 These sentence indicates very significant things to estimate ablation under debris-layer based on mean debris thickness. I recommend that each percent of debris thickness frequency between 0-0.5 m in debris thickness and each calculated ablation ratio between 0-0.5 m in debris thickness at each three site should be shown in the text.

We initially avoided highlighting the exact values resulting from our model as we intend it to be illustrative. The exact values will depend on the local Østrem curve and local debris thickness distribution.

For the mid-bin values of the distributions shown in Figure 5 the ration of debris covered to clean ice ablation are as follows

| <b>h<sub>d</sub> bin (m)</b>          | <b>0.0 - 0.1</b> | <b>0.1 - 0.2</b> | <b>0.2 - 0.3</b> | <b>0.3 - 0.4</b> | <b>0.4 - 0.5</b> |
|---------------------------------------|------------------|------------------|------------------|------------------|------------------|
| Margin (GPR)                          | 0                | 0                | 0                | 0                | 0                |
| Gokyo (GPR)                           | 0                | 0                | 0                | 1                | 2                |
| Uplacier (survey)                     | 1                | 16               | 22               | 11               | 11               |
| <b>h<sub>d</sub> bin midpoint (m)</b> | <b>0.05</b>      | <b>0.15</b>      | <b>0.25</b>      | <b>0.35</b>      | <b>0.45</b>      |
| Ablation ratio                        | 0.92             | 0.59             | 0.44             | 0.34             | 0.29             |

We can add this information into the manuscript if deemed essential but prefer not to as its specific to the illustrative cases given in the paper.

L389 'Visual inspection of the radargrams indicates that the thinnest debris cover occurs on steep slopes (Fig. 7a and b).' » I cannot agree with this sentence. For me, by visual inspection, it seems that depression of ice surface are filled with debris, as a result, debris surface have flatter features than that of ice surface under the debris. All example show such tendency in Fig. 7.

Yes, this is a good way of expressing the general pattern and we now write: 2 Visual inspection of the radargrams indicates that the thickest debris is found filling depressions in the underlying ice surface, and thinner debris is more commonly seen overlying steeper ice surfaces (Fig. 7a and b)."

Line394 'the debris surface is approximately parallel to the ice surface,' » This sentence does not conflict with previous sentence 'Visual inspection of the radargrams indicates that the thinnest debris cover occurs on steep slopes' at Line 389 ??

We now write: "On steeper slopes where the debris surface is approximately parallel to the ice surface, this appears to be a characteristic of debris covers at or near the limits of gravitational instability."

L390 '(Fig. 7a and b).' » '(Fig. 7a and c).''???

Changed to Fig 7a.

L397 'Modelled surface flowpaths (Fig. 7b) cross-cut the GPR transects where these depressions are located, indicating that they were likely incised by meltwater.' » I'm confused when I checked the cross section of Fig. 7c and f. You have calculated the flowpath based on DEM from Pleiades. But, the surface features indicated by GPR cross section do not represent cross section of flowpath (no depression). The surface elevation of debris is not true?

The surface elevation of the profiles shown is topographically corrected. However, as the GPR profiles only show the surface in two dimensions, whereas upstream contributing area, which was used to generate the flow paths, was calculated using the 3D DTM, there is not necessarily a clear depression across the profile associated with each flowpath.

L417 and Fig. 7h » How did you detect the location of former pond? 'Former pond' in Fig. 7h means pond in 1984?

The former pond locations are indicated from the air photograph and satellite image mapping, but also based on field observations that the radar line location here crossed well sorted, stratified fines, indicating lacustrine deposition.

We now say: "Since 1984, the existence of supraglacial ponds within the Gokyo study area is likely to have affected two areas of radar transects: Several transects towards the north of the Gokyo study area, which may have been partially affected by lakes in 2012 and 2014, and a single transect towards the east of the Gokyo study area, which crossed clearly lacustrine surface deposits was partially affected by lakes in all the sampled years except 2014 and 2016 (Fig. 4)."

L434-435 'Binning the thickness data with respect to slope indicates a step decrease in debris thickness above surface slope angles of around 20-23 ° (Fig. 8a).' » I recommend that difference between debris thickness at steep slope and those at gentle slope were significant or not statistically.

We now added: "...slope indicates a non-statistically significant step decrease ..."

L434- As I wrote at Line 394, it seems that depression of ice surface are filled with debris, as a result, debris surface have flatter features than that of ice surface under the debris from Fig. 7 by visual inspection. Then, ice surface (not debris surface) curvature might have relation with debris-thickness. Probably I think some relation can be found between ice surface curvature and debris-thickness by optimizing the scale of curvature. But, it's not your purpose, and the analysis is limited at the GPR survey lines.

We agree, but we can't calculate ice surface curvature from two-dimensional GPR profiles, and the aim of this part of the analysis was to see if a viable relationship existed between debris thickness and (relatively) readily determined surface properties. We modified this sentence slightly to clarify this: "The debris thickness sampled with GPR in this study does not show distinct relations with surface slope, aspect or curvature, that could be readily extracted from glacier surface terrain models (Fig. 8a, b, c)."

L448 'This effect is observable in global radiation data (Fig. 8d).'» If you add calculated solar radiation at the top of the atmosphere in Fig. 8d, it is easy to understand.

We have added this into the figure.

Fig. 4 Shore lines of ponds are unclear for me because they are overlapping. I recommend that only shore lines are depicted in this figure. And add the information of the background images.

We prefer to show the GPR lines in the context of the ponds. The background images is given in the caption as the hillshade from the Pleiades DTM, and the images from which the lakes are mapped are described in the text: "The recent history of ponded water on the parts of the glacier surface sampled by the radar transects was mapped using air photographs from 1984 (see Washburn, 1989 for details), and seven cloud-free optical satellite images spanning 2008-2016. The satellite images consisted of six Digital Globe images, and one CNES/Astrium image, all obtained via Google Earth, and the optical image from the 2016 Pleiades acquisition used to generate the DTM." We feel this adequately described the figure source information and would prefer to keep it as it is.

Fig. 5 There is no information about the intervals of debris thickness in d-f. And please add the information that 'Dashed vertical lines indicate mean debris thickness' or something.

Caption now reads: "Figure 5: Percentage frequency histograms of debris thickness (hd) in 0.1 m intervals, and mean debris thickness as vertical dashed lines for (a) the Ngozumpa Margin study site; (b) the Ngozumpa Gokyo study site; (c) the Ngozumpa Uplacier study site; (d) over the lower tongue of Lirung glacier in central Nepal; (e) across the debris covered ablation area of Suldenferner/Ghiacciaio de Solda in the Italian Alps and (f) the medial moraine of Haut Glacier d'Arolla in the Swiss Alps. Measurement methods are GPR (black); theodolite surveys (blue); Structure from Motion (SfM-MVS) photographic terrain model (green) and excavation of pits (red). Note that axes vary between sites, and summary statistics of these distributions are in Table 2."

Fig. 7 Locations of Fig. 7b, f, h are required.

As the figure is already quite busy, and the specific locations of each radar transect shown are not as relevant as their relation to the other features we prefer to leave this figure as it is.

Table 2 I recommend that percentage of thin debris thickness frequency are necessary in Table 2. For example, the range between 0-0.25 m and 0.25-0.5 m in debris thickness. Because, the thin debris layer effect the bias of ablation and surface temperature

For the mid-bin values of the distributions shown in Figure 5 the ration of debris covered to clean ice ablation are as follows

| <b>h<sub>d</sub> bin (m)</b>          | <b>0.0 - 0.1</b> | <b>0.1 - 0.2</b> | <b>0.2 - 0.3</b> | <b>0.3 - 0.4</b> | <b>0.4 - 0.5</b> |
|---------------------------------------|------------------|------------------|------------------|------------------|------------------|
| Margin (GPR)                          | 0                | 0                | 0                | 0                | 0                |
| Gokyo (GPR)                           | 0                | 0                | 0                | 1                | 2                |
| Upglacier (survey)                    | 1                | 16               | 22               | 11               | 11               |
| <b>h<sub>d</sub> bin midpoint (m)</b> | <b>0.05</b>      | <b>0.15</b>      | <b>0.25</b>      | <b>0.35</b>      | <b>0.45</b>      |
| Ablation ratio                        | 0.92             | 0.59             | 0.44             | 0.34             | 0.29             |

We can add this information into the manuscript if deemed essential but prefer not to as its specific to the illustrative cases given in the paper.

Finally, we would like to point out three changes that have been made further to those requested in the reviews.

- 1) While doing the additional sensitivity tests on the slope stability model suggested by reviewer 1, we noticed a coding error causing areal percentage slope stability/instability excluding ponds and ice cliffs to be wrong. We have adjusted the values accordingly in the manuscript and figures. This does not affect the conclusions of the paper, but rather strengthens our argument that relatively large areas of the debris surface are unstable, on the basis that the values that exclude ponds and ice cliffs are now more similar to those that include ponds and ice cliffs.  
This led to a change in the text as follows: "Slope stability modelling suggests that, under mid-August ablation conditions, the percentage of the debris-covered area interpreted as potentially unstable for the three study areas of Ngozumpa Glacier is between 13 and 34% including ponds and ice cliffs, and between 12 and 22% 10 and 32% if ponds and ice cliffs are excluded (Fig. 9)."
- 2) We also noticed that we had used the incorrect colour map in Figure 9d and this has also been corrected in the revised manuscript.
- 3) The reference to Del Gobbo (2017) was previously missing from the reference list, but has been added now.
